# Supplementary material for: Sporadic Hirschsprung Disease: Mutational Spectrum and Novel Candidate Genes Revealed by Next-generation Sequencing
Source: PubMed Central journal article supplement (PMC5666020; doi:10.1038/s41598-017-14835-6), 2017-11-01
Supplement: 41598_2017_14835_MOESM1_ESM.pdf [file 41598_2017_14835_MOESM1_ESM.pdf]

**Sporadic Hirschsprung Disease: Mutational Spectrum and Novel Candidate Genes  
Revealed by Next-generation Sequencing**

Zhen Zhang<sup>1</sup>, Qi Li<sup>1</sup>, Mei Diao<sup>1</sup>, Na Liu<sup>2</sup>, Wei Cheng<sup>3</sup>, Ping Xiao<sup>4</sup>, Jizhen Zou<sup>4</sup>, Lin Su<sup>5</sup>, Kaihui Yu<sup>6</sup>, Jian Wu<sup>2</sup>, Long Li<sup>1</sup>, Qian Jiang<sup>7\*</sup>

*<sup>1</sup>Department of General Surgery, Capital Institute of Pediatrics, Beijing, China*

*<sup>2</sup>MyGenostics Inc. Beijing, China*

*<sup>3</sup>Department of Surgery, Beijing United Family Hospital, Beijing, China; Department of Paediatrics and Surgery, Faculty of Medicine, Nursing and Health Sciences, Monash University, Victoria, Australia*

*<sup>4</sup>Department of Pathology, Capital Institute of Pediatrics Affiliated Children's Hospital, Beijing, China*

*<sup>5</sup>Reproductive Medicine Center, Clinical College of PLA Affiliated Anhui Medical University, Hefei, China*

*<sup>6</sup>Department of Pathophysiology, School of Preclinical Sciences, Guangxi Medical University, Nanning, China*

*<sup>7</sup>Department of Medical Genetics, Beijing Municipal Key Laboratory of Child Development and Nutriomics, Capital Institute of Pediatrics, Beijing, China*

## **Supplementary Materials**

### **Supplementary Table Legends:**

**Table S1:** List of the 172 selected genes in targeted next-generation sequencing among Chinese HSCR patients.

**Table S2:** Quality of the targeted next-generation sequencing data.

**Table S3:** Comparison of the frequency, type and novelty of likely gene-disrupting variants in 13 genes in the HSCR cases and controls.

**Table S4:** Results of sequence kernel association test on  $LGD_{\text{broad}}$  variants implicating genes with a FDR  $<0.05$ .

### Supplementary Figure Legends:

**Fig. S1** Variant composition and distribution across 8 categories (frameshift, in-frame, intronic, non-synonymous, splicing, stop-gain, synonymous, and UTR) before (A) and after (B) the two-step variant filtering process.

**Fig. S2** IGV screen-shot of the targeted next-generation sequencing of *FARPI* (A) and the Sanger-sequence chromatogram (B) of HSCR0048.

**Fig. S3** Sample and LGD<sub>broad</sub> variant spectrum. x axis, 83 sample IDs; y axis, gene symbols for LGD<sub>broad</sub> variants. LGD<sub>broad</sub> variants are composed of: frameshift indels (red), in-frame indels (blue), non-synonymous variants predicted to be damaging by at least three bioinformatics tools (green), splice region ( $\pm 5$ ) variants (purple), and stop-gain variants (orange).

**Fig. S4** Expression and spatial distribution of 12 proteins in normal human colon tissue. Images were downloaded from The Human Protein Atlas database (<http://www.proteinatlas.org/>).

**Supp. Table S1. List of the 172 selected genes in targeted next-generation sequencing among Chinese HSCR patients**

| <i>No.</i> | <i>Official symbol</i>        | <i>Chromosome location</i> | <i>Entrez gene ID</i> | <i>Protein size<br/>(No. of amino-acids)</i> | <i>Selection criteria</i>                                                           | <i>References</i> |
|------------|-------------------------------|----------------------------|-----------------------|----------------------------------------------|-------------------------------------------------------------------------------------|-------------------|
| 1          | <i>RET</i>                    | 10q11.21                   | 5979                  | 1114                                         |                                                                                     |                   |
| 2          | <i>EDNRB</i>                  | 13q22.3                    | 1910                  | 442                                          |                                                                                     |                   |
| 3          | <i>SEMA3D</i>                 | 7q21.11                    | 223117                | 777                                          |                                                                                     |                   |
| 4          | <i>SEMA3C</i>                 | 7q21.11                    | 10512                 | 751                                          |                                                                                     |                   |
| 5          | <i>NRG1</i>                   | 8p12                       | 3084                  | 640                                          |                                                                                     |                   |
| 6          | <i>PHOX2B</i>                 | 4p13                       | 8929                  | 314                                          |                                                                                     |                   |
| 7          | <i>SOX10</i>                  | 22q13.1                    | 6663                  | 466                                          | Known HSCR<br>genes (evidence<br>from human study)                                  | 1-5               |
| 8          | <i>ECE1</i>                   | 1p36.12                    | 1889                  | 770                                          |                                                                                     |                   |
| 9          | <i>EDN3</i>                   | 20q13.32                   | 1908                  | 238                                          |                                                                                     |                   |
| 10         | <i>GDNF</i>                   | 5p13.2                     | 2668                  | 211                                          |                                                                                     |                   |
| 11         | <i>KIF1BP (KIAA1279)</i>      | 10q22.1                    | 26128                 | 621                                          |                                                                                     |                   |
| 12         | <i>LICAM</i>                  | Xq28                       | 3897                  | 1257                                         |                                                                                     |                   |
| 13         | <i>NRTN</i>                   | 19p13.3                    | 4902                  | 197                                          |                                                                                     |                   |
| 14         | <i>TCF4</i>                   | 18q21.2                    | 6925                  | 667                                          |                                                                                     |                   |
| 15         | <i>ZEB2</i>                   | 2q22.3                     | 9839                  | 1214                                         |                                                                                     |                   |
| 16         | <i>NAV2</i>                   | 11p15.1                    | 89797                 | 2488                                         |                                                                                     |                   |
| 17         | <i>WWOX</i>                   | 16q23.1                    | 51741                 | 414                                          |                                                                                     |                   |
| 18         | <i>KIAA0368</i>               | 9q31.3                     | 23392                 | 1845                                         |                                                                                     |                   |
| 19         | <i>PLEKHA1</i>                | 10q26.13                   | 59338                 | 404                                          | Known HSCR<br>candidate genes<br>(evidence from<br>CNV or gene<br>expression study) | 6-8               |
| 20         | <i>MAPK10</i>                 | 4q21.3                     | 5602                  | 464                                          |                                                                                     |                   |
| 21         | <i>LARGE 1 (LARGE)</i>        | 22q12.3                    | 9215                  | 756                                          |                                                                                     |                   |
| 22         | <i>SYN3</i>                   | 22q12.3                    | 8224                  | 580                                          |                                                                                     |                   |
| 23         | <i>GRIN2B</i>                 | 12p13.1                    | 2904                  | 1484                                         |                                                                                     |                   |
| 24         | <i>LRRTM4</i>                 | 2p12                       | 80059                 | 590                                          |                                                                                     |                   |
| 25         | <i>SOX2</i>                   | 3q26.33                    | 6657                  | 317                                          |                                                                                     |                   |
| 26         | <i>NCRNA00158 (LINC00158)</i> | 21q21.3                    | 54072                 | 81                                           |                                                                                     |                   |

|    |                       |          |        |      |                                                                        |      |
|----|-----------------------|----------|--------|------|------------------------------------------------------------------------|------|
| 27 | <i>DLX2</i>           | 2q31.1   | 1746   | 328  | Known HSCR candidate genes (evidence from mouse study)                 | 9-13 |
| 28 | <i>GFRA1</i>          | 10q25.3  | 2674   | 465  |                                                                        |      |
| 29 | <i>ARAF</i>           | Xp11.23  | 369    | 606  |                                                                        |      |
| 30 | <i>GRB10</i>          | 7p12.1   | 2887   | 594  |                                                                        |      |
| 31 | <i>HOXA2</i>          | 7p15.2   | 3199   | 376  |                                                                        |      |
| 32 | <i>PHACTR4</i>        | 1p35.3   | 65979  | 702  |                                                                        |      |
| 33 | <i>TLX2</i>           | 2p13.1   | 3196   | 284  |                                                                        |      |
| 34 | <i>ZIC2</i>           | 13q32.3  | 7546   | 532  |                                                                        |      |
| 35 | <i>GPR98 (ADGRV1)</i> | 5q14.3   | 84059  | 6306 | New HSCR candidate genes (evidence from the WES study &ENS expression) |      |
| 36 | <i>UBR4</i>           | 1p36.13  | 23352  | 5183 |                                                                        |      |
| 37 | <i>FAT1</i>           | 4q35.2   | 2195   | 4588 |                                                                        |      |
| 38 | <i>SACS</i>           | 13q12.12 | 26278  | 4579 |                                                                        |      |
| 39 | <i>DST</i>            | 6p12.1   | 667    | 7570 |                                                                        |      |
| 40 | <i>POLE</i>           | 12q24.33 | 5426   | 2286 |                                                                        |      |
| 41 | <i>IFIH1</i>          | 2q24.2   | 64135  | 1025 |                                                                        |      |
| 42 | <i>ODZ3 (TENM3)</i>   | 4q35.1   | 55714  | 2699 |                                                                        |      |
| 43 | <i>BIRC6</i>          | 2p22.3   | 57448  | 4857 |                                                                        |      |
| 44 | <i>ZFHX3</i>          | 16q22.3  | 463    | 3703 |                                                                        |      |
| 45 | <i>AGL</i>            | 1p21.2   | 178    | 1532 |                                                                        |      |
| 46 | <i>COL11A1</i>        | 1p21.1   | 1301   | 1806 |                                                                        |      |
| 47 | <i>MICAL2</i>         | 11p15.3  | 9645   | 1124 |                                                                        |      |
| 48 | <i>ATM</i>            | 11q22.3  | 472    | 3056 |                                                                        |      |
| 49 | <i>TBC1D9B</i>        | 5q35.3   | 23061  | 1250 |                                                                        |      |
| 50 | <i>LAMA1</i>          | 18p11.3  | 284217 | 3075 |                                                                        |      |
| 51 | <i>APC</i>            | 5q22.2   | 324    | 2843 |                                                                        |      |
| 52 | <i>ANK3</i>           | 10q21.2  | 288    | 4377 |                                                                        |      |
| 53 | <i>SORL1</i>          | 11q24.1  | 6653   | 2214 |                                                                        |      |
| 54 | <i>PTPN13</i>         | 4q21.3   | 5783   | 2485 |                                                                        |      |
| 55 | <i>SPTAN1</i>         | 9q34.11  | 6709   | 2472 |                                                                        |      |
| 56 | <i>TULP4</i>          | 6q25.3   | 56995  | 1543 |                                                                        |      |

|    |                 |          |        |      |
|----|-----------------|----------|--------|------|
| 57 | <i>KANK1</i>    | 9p24.3   | 23189  | 1352 |
| 58 | <i>NID2</i>     | 14q22.1  | 22795  | 1375 |
| 59 | <i>TRRAP</i>    | 7q22.1   | 8295   | 3859 |
| 60 | <i>DMD</i>      | Xp21.2   | 1756   | 3685 |
| 61 | <i>DMXL2</i>    | 15q21.2  | 23312  | 3036 |
| 62 | <i>MPDZ</i>     | 9p23     | 8777   | 2070 |
| 63 | <i>AGRN</i>     | 1p36.33  | 375790 | 2067 |
| 64 | <i>CFTR</i>     | 7q31.2   | 1080   | 1480 |
| 65 | <i>MDNI</i>     | 6q15     | 23195  | 5596 |
| 66 | <i>KALRN</i>    | 3q21.2   | 8997   | 2985 |
| 67 | <i>HERC1</i>    | 15q22.31 | 8925   | 4861 |
| 68 | <i>FLNB</i>     | 3p14.3   | 2317   | 2602 |
| 69 | <i>ACSS2</i>    | 20q11.22 | 55902  | 701  |
| 70 | <i>BAZ2B</i>    | 2q24.2   | 29994  | 2168 |
| 71 | <i>BCMO1</i>    | 16q23.2  | 53630  | 547  |
| 72 | <i>CHD1</i>     | 5q15     | 1105   | 1710 |
| 73 | <i>COL14A1</i>  | 8q24.12  | 7373   | 1796 |
| 74 | <i>DSP</i>      | 6p24.3   | 1832   | 2871 |
| 75 | <i>EML4</i>     | 2p21     | 27436  | 981  |
| 76 | <i>FRMD4B</i>   | 3p14.1   | 23150  | 1034 |
| 77 | <i>LRP6</i>     | 12p13.2  | 4040   | 1613 |
| 78 | <i>MAGI3</i>    | 1p13.2   | 260425 | 1506 |
| 79 | <i>PLEKHH1</i>  | 14q24.1  | 57475  | 1364 |
| 80 | <i>RANBP17</i>  | 5q35.1   | 64901  | 1088 |
| 81 | <i>TSRI</i>     | 17p13.3  | 55720  | 804  |
| 82 | <i>ARVCF</i>    | 22q11.21 | 421    | 962  |
| 83 | <i>SULF1</i>    | 8q13.3   | 23213  | 871  |
| 84 | <i>NUP155</i>   | 5p13.2   | 9631   | 1391 |
| 85 | <i>ADAMTS15</i> | 11q24.3  | 170689 | 950  |
| 86 | <i>KIAA1109</i> | 4q27     | 84162  | 5005 |

|     |                     |          |       |      |
|-----|---------------------|----------|-------|------|
| 87  | <i>TRAP1</i>        | 16p13.3  | 10131 | 704  |
| 88  | <i>FBN2</i>         | 5q23.3   | 2201  | 2912 |
| 89  | <i>UTP20</i>        | 12q23.2  | 27340 | 2785 |
| 90  | <i>VPS13C</i>       | 15q22.2  | 54832 | 3753 |
| 91  | <i>MYOF</i>         | 10q23.33 | 26509 | 2061 |
| 92  | <i>MACF1</i>        | 1p34.3   | 23499 | 7388 |
| 93  | <i>AARS</i>         | 16q22.1  | 16    | 968  |
| 94  | <i>AP3B2</i>        | 15q25.2  | 8120  | 1082 |
| 95  | <i>APPL2</i>        | 12q23.3  | 55198 | 664  |
| 96  | <i>ASTN1</i>        | 1q25.2   | 460   | 1302 |
| 97  | <i>ATG2B</i>        | 14q32.2  | 55102 | 2078 |
| 98  | <i>COL6A2</i>       | 21q22.3  | 1292  | 1019 |
| 99  | <i>CPNE1</i>        | 20q11.22 | 8904  | 537  |
| 100 | <i>CREBBP</i>       | 16p13.3  | 1387  | 2442 |
| 101 | <i>ENO3</i>         | 17p13.2  | 2027  | 434  |
| 102 | <i>EPB41L3</i>      | 18p11.31 | 23136 | 1087 |
| 103 | <i>EPHA7</i>        | 6q16.1   | 2045  | 998  |
| 104 | <i>ERCC3</i>        | 2q14.3   | 2071  | 782  |
| 105 | <i>GSN</i>          | 9q33.2   | 2934  | 782  |
| 106 | <i>PATJ (INADL)</i> | 1p31.3   | 10207 | 1801 |
| 107 | <i>MMP1</i>         | 11q22.2  | 4312  | 469  |
| 108 | <i>MYH9</i>         | 22q12.3  | 4627  | 1960 |
| 109 | <i>NEDD9</i>        | 6p24.2   | 4739  | 834  |
| 110 | <i>NUP188</i>       | 9q34.11  | 23511 | 1749 |
| 111 | <i>PKD2</i>         | 4q22.1   | 5311  | 968  |
| 112 | <i>RERE</i>         | 1p36.23  | 473   | 1566 |
| 113 | <i>SH3PXD2A</i>     | 10q24.33 | 9644  | 1133 |
| 114 | <i>SRRM1</i>        | 1p36.11  | 10250 | 904  |
| 115 | <i>TANC1</i>        | 2q24.2   | 85461 | 1861 |
| 116 | <i>TPR</i>          | 1q31.1   | 7175  | 2363 |

|     |                 |          |        |      |
|-----|-----------------|----------|--------|------|
| 117 | <i>TRIO</i>     | 5p15.2   | 7204   | 3097 |
| 118 | <i>VPS16</i>    | 20p13    | 64601  | 839  |
| 119 | <i>XYLT1</i>    | 16p12.3  | 64131  | 959  |
| 120 | <i>CAMTA1</i>   | 1p36.31  | 23261  | 1673 |
| 121 | <i>COL6A3</i>   | 2q37.3   | 1293   | 3177 |
| 122 | <i>FARP1</i>    | 13q32.2  | 10160  | 1045 |
| 123 | <i>COLEC12</i>  | 18p11.32 | 81035  | 742  |
| 124 | <i>HECTD1</i>   | 14q12    | 25831  | 2610 |
| 125 | <i>FRYL</i>     | 4p11     | 285527 | 3013 |
| 126 | <i>CAPN2</i>    | 1q41     | 824    | 700  |
| 127 | <i>PTCH1</i>    | 9q22.32  | 5727   | 1447 |
| 128 | <i>DYNC1H1</i>  | 14q32.31 | 1778   | 4646 |
| 129 | <i>PYGB</i>     | 20p11.21 | 5834   | 843  |
| 130 | <i>IQGAP2</i>   | 5q13.3   | 10788  | 1575 |
| 131 | <i>LRIG1</i>    | 3p14.1   | 26018  | 1093 |
| 132 | <i>KIAA1217</i> | 10p12.2  | 56243  | 1943 |
| 133 | <i>EHBP1</i>    | 2p15     | 23301  | 1231 |
| 134 | <i>USP45</i>    | 6q16.2   | 85015  | 814  |
| 135 | <i>ERCC4</i>    | 16p13.12 | 2072   | 916  |
| 136 | <i>SVIL</i>     | 10p11.23 | 6840   | 2214 |
| 137 | <i>CELSR3</i>   | 3p21.31  | 1951   | 3312 |
| 138 | <i>PYGL</i>     | 14q22.1  | 5836   | 847  |
| 139 | <i>MYOM1</i>    | 18p11.31 | 8736   | 1685 |
| 140 | <i>EXO1</i>     | 1q43     | 9156   | 846  |
| 141 | <i>PHKB</i>     | 16q12.1  | 5257   | 1093 |
| 142 | <i>UGGT2</i>    | 13q32.1  | 55757  | 1516 |
| 143 | <i>PAX3</i>     | 2q35     | 5077   | 479  |
| 144 | <i>FZD3</i>     | 8p21     | 7976   | 666  |
| 145 | <i>VANGL1</i>   | 1p13.1   | 81839  | 524  |
| 146 | <i>VANGL2</i>   | 1q22-q23 | 57216  | 521  |

New HSCR  
candidate genes  
(evidence from the  
ENS development)

14-17



|     |                           |               |        |      |                    |
|-----|---------------------------|---------------|--------|------|--------------------|
| 147 | <i>PRICKLE1</i>           | 12q12         | 144165 | 831  |                    |
| 148 | <i>PRICKLE2</i>           | 3p14.1        | 166336 | 844  |                    |
| 149 | <i>DVL1</i>               | 1p36          | 1855   | 695  |                    |
| 150 | <i>DVL2</i>               | 17p13.1       | 1856   | 736  |                    |
| 151 | <i>SHH</i>                | 7q36          | 6469   | 462  |                    |
| 152 | <i>DLL3</i>               | 19q13         | 10683  | 618  |                    |
| 153 | <i>GLI1</i>               | 12q13.2-q13.3 | 2735   | 1106 |                    |
| 154 | <i>NOTCH1</i>             | 9q34.3        | 4851   | 2555 |                    |
| 155 | <i>NOTCH2</i>             | 1p13-p11      | 4853   | 2471 |                    |
| 156 | <i>DLL1</i>               | 6q27          | 28514  | 723  |                    |
| 157 | <i>HES1</i>               | 3q28-q29      | 3280   | 280  |                    |
| 158 | <i>HOXB5</i>              | 17q21.3       | 3215   | 269  |                    |
| 159 | <i>TCOF1</i>              | 5q32          | 6949   | 1488 |                    |
| 160 | <i>HMCN1</i>              | 1q31.1        | 83872  | 5635 |                    |
| 161 | <i>DNAJC13</i>            | 3q22.1        | 23317  | 2243 |                    |
| 162 | <i>LRP1B</i>              | 2q22.1        | 53353  | 4599 |                    |
| 163 | <i>RNF123</i>             | 3p21.31       | 63891  | 1314 |                    |
| 164 | <i>GAPVD1</i>             | 9q33.3        | 26130  | 1478 |                    |
| 165 | <i>INVS</i>               | 9q31.1        | 27130  | 1065 | New HSCR           |
| 166 | <i>USP13</i>              | 3q26.33       | 8975   | 863  | candidate genes    |
| 167 | <i>ABCA1</i>              | 9q31.1        | 19     | 2261 | (evidence from the |
| 168 | <i>ADAMTS17</i>           | 15q26.3       | 170691 | 1095 | WES study)         |
| 169 | <i>CFAP206 (C6orf165)</i> | 6q15          | 154313 | 622  |                    |
| 170 | <i>HHIPL2</i>             | 1q41          | 79802  | 724  |                    |
| 171 | <i>MERTK</i>              | 2q13          | 10461  | 999  |                    |
| 172 | <i>UBA6</i>               | 4q13.2        | 55236  | 1052 |                    |

**Supp. Table S2. Quality of the targeted NGS data**

| <i>Item</i> | <i>Clean data (Mb)</i> | <i>Aligned (%)</i> | <i>Effective sequence on target (Mb)</i> | <i>Fraction of effective bases on target (%)</i> | <i>Average sequencing depth on target</i> | <i>Fraction of target covered at least 10× (%)</i> | <i>Fraction of target covered at least 20× (%)</i> |
|-------------|------------------------|--------------------|------------------------------------------|--------------------------------------------------|-------------------------------------------|----------------------------------------------------|----------------------------------------------------|
| Average     | 582.5                  | 99.33              | 276.2                                    | 51.40                                            | 266.8                                     | 92.30                                              | 85.20                                              |
| Maximum     | 1693.7                 | 99.88              | 633.9                                    | 64.40                                            | 614.9                                     | 99.50                                              | 98.90                                              |
| Minimum     | 153.3                  | 97.74              | 76.9                                     | 23.50                                            | 74.2                                      | 74.90                                              | 61.50                                              |
| Medium      | 557.1                  | 99.38              | 273.7                                    | 53.10                                            | 264.2                                     | 92.30                                              | 84.80                                              |

**Supp. Table S3. Comparison of the frequency, type and novelty of likely gene-disrupting variants in 13 genes in the HSCR cases and controls**

| <i>Gene symbol</i> | <i>HSCR patients (N=83)</i>                    |                                              |                                        | <i>Controls (N=316)</i>                        |             |                            |
|--------------------|------------------------------------------------|----------------------------------------------|----------------------------------------|------------------------------------------------|-------------|----------------------------|
|                    | <i>Number of LGD<sub>strict</sub> variants</i> | <i>Type</i>                                  | <i>Novel or reported</i>               | <i>Number of LGD<sub>strict</sub> variants</i> | <i>Type</i> | <i>Novel or reported</i>   |
| <i>ENO3</i>        | 1                                              | Stop-gain                                    | rs550460218                            | 0                                              | NA          | NA                         |
| <i>PTPN13</i>      | 1                                              | Stop-gain                                    | Novel                                  | 0                                              | NA          | NA                         |
| <i>RET</i>         | 7                                              | 5 Stop-gain<br>1<br>Frameshift<br>1 Splicing | 6 Novel<br>1 Reported<br>(rs775711017) | 0                                              | NA          | NA                         |
| <i>SACS</i>        | 1                                              | Frameshift                                   | rs761184491                            | 1                                              | Frameshift  | rs761200300                |
| <i>PLEKHH1</i>     | 1                                              | Stop-gain                                    | rs111462449                            | 0                                              | NA          | NA                         |
| <i>TRAP1</i>       | 1                                              | Frameshift                                   | Novel                                  | 1                                              | Stop-gain   | rs371020906                |
| <i>EXO1</i>        | 1                                              | Stop-gain                                    | Novel                                  | 0                                              | NA          | NA                         |
| <i>ZEB2</i>        | 1                                              | Stop-gain                                    | Reported<br>(Pathogenic)               | 0                                              | NA          | NA                         |
| <i>AGL</i>         | 1                                              | Stop-gain                                    | rs781580050<br>(Pathogenic)            | 1                                              | Frameshift  | rs760589837                |
| <i>SEMA3D</i>      | 1                                              | Stop-gain                                    | Novel                                  | 0                                              | NA          | NA                         |
| <i>PHKB</i>        | 1                                              | Stop-gain                                    | Novel                                  | 0                                              | NA          | NA                         |
| <i>HHIPL2</i>      | 1                                              | Frameshift                                   | rs748262144                            | 2                                              | Splicing    | rs199911924<br>rs577700102 |
| <i>TLX2</i>        | 1                                              | Frameshift                                   | Novel                                  | 0                                              | NA          | NA                         |

NA: not available.

**Supp. Table S4. Results of sequence kernel association test on LGD<sub>broad</sub> variants implicating genes with a FDR <0.05**

| <b>Genes</b>    | <b>P value</b> | <b>FDR</b> |
|-----------------|----------------|------------|
| <i>ZFHX3</i>    | 2.54E-12       | 3.32E-10   |
| <i>RET</i>      | 5.20E-11       | 3.41E-09   |
| <i>NRG1</i>     | 4.17E-07       | 1.82E-05   |
| <i>CFTR</i>     | 6.84E-07       | 2.24E-05   |
| <i>AGL</i>      | 4.11E-05       | 0.001077   |
| <i>IQGAP2</i>   | 9.69E-05       | 0.002116   |
| <i>LAMA1</i>    | 0.000332       | 0.005641   |
| <i>NID2</i>     | 0.000377       | 0.005641   |
| <i>RERE</i>     | 0.000388       | 0.005641   |
| <i>IFIH1</i>    | 0.000714       | 0.009359   |
| <i>MYOF</i>     | 0.000993       | 0.011829   |
| <i>APC</i>      | 0.001155       | 0.012067   |
| <i>ZEB2</i>     | 0.001208       | 0.012067   |
| <i>PTPN13</i>   | 0.00129        | 0.012067   |
| <i>DMD</i>      | 0.001659       | 0.014491   |
| <i>TRAP1</i>    | 0.001857       | 0.015202   |
| <i>CELSR3</i>   | 0.002226       | 0.01715    |
| <i>ADAMTS17</i> | 0.004172       | 0.01793    |
| <i>PHACTR4</i>  | 0.004194       | 0.01793    |
| <i>KANK1</i>    | 0.004208       | 0.01793    |
| <i>NUP155</i>   | 0.004229       | 0.01793    |
| <i>EML4</i>     | 0.004252       | 0.01793    |
| <i>FARP1</i>    | 0.004258       | 0.01793    |
| <i>CREBBP</i>   | 0.004259       | 0.01793    |
| <i>NOTCH2</i>   | 0.004268       | 0.01793    |
| <i>CFAP206</i>  | 0.004297       | 0.01793    |
| <i>FBN2</i>     | 0.0043         | 0.01793    |
| <i>SH3PXD2A</i> | 0.004316       | 0.01793    |
| <i>ABCA1</i>    | 0.004322       | 0.01793    |
| <i>AP3B2</i>    | 0.004413       | 0.01793    |
| <i>HMCN1</i>    | 0.004447       | 0.01793    |
| <i>ARVCF</i>    | 0.004579       | 0.01793    |
| <i>TSR1</i>     | 0.004589       | 0.01793    |
| <i>FLNB</i>     | 0.004654       | 0.01793    |
| <i>PATJ</i>     | 0.005278       | 0.019755   |
| <i>COL11A1</i>  | 0.006813       | 0.024792   |
| <i>SORL1</i>    | 0.008282       | 0.029113   |
| <i>NOTCH1</i>   | 0.008445       | 0.029113   |
| <i>AGRN</i>     | 0.011116       | 0.029871   |
| <i>EXO1</i>     | 0.013108       | 0.029871   |

|                 |          |          |
|-----------------|----------|----------|
| <i>UBR4</i>     | 0.013383 | 0.029871 |
| <i>ADGRV1</i>   | 0.013506 | 0.029871 |
| <i>PYGB</i>     | 0.013561 | 0.029871 |
| <i>MICAL2</i>   | 0.013584 | 0.029871 |
| <i>TENM3</i>    | 0.013672 | 0.029871 |
| <i>BIRC6</i>    | 0.013738 | 0.029871 |
| <i>ECE1</i>     | 0.013805 | 0.029871 |
| <i>PRICKLE1</i> | 0.013828 | 0.029871 |
| <i>ENO3</i>     | 0.013861 | 0.029871 |
| <i>PLEKHH1</i>  | 0.013873 | 0.029871 |
| <i>HERC1</i>    | 0.013894 | 0.029871 |
| <i>APPL2</i>    | 0.01395  | 0.029871 |
| <i>SACS</i>     | 0.013963 | 0.029871 |
| <i>SRRM1</i>    | 0.013995 | 0.029871 |
| <i>DMXL2</i>    | 0.014051 | 0.029871 |
| <i>PTCH1</i>    | 0.014063 | 0.029871 |
| <i>MYH9</i>     | 0.014085 | 0.029871 |
| <i>GRIN2B</i>   | 0.014085 | 0.029871 |
| <i>USP45</i>    | 0.014141 | 0.029871 |
| <i>SVIL</i>     | 0.014164 | 0.029871 |
| <i>PHKB</i>     | 0.014286 | 0.029871 |
| <i>ATM</i>      | 0.014355 | 0.029871 |
| <i>XYLT1</i>    | 0.014365 | 0.029871 |
| <i>EHBP1</i>    | 0.014714 | 0.030118 |
| <i>KIAA1109</i> | 0.021628 | 0.04359  |
| <i>MACF1</i>    | 0.024251 | 0.048052 |
| <i>VPS13C</i>   | 0.024576 | 0.048052 |

Supplementary Fig. S1

**A**

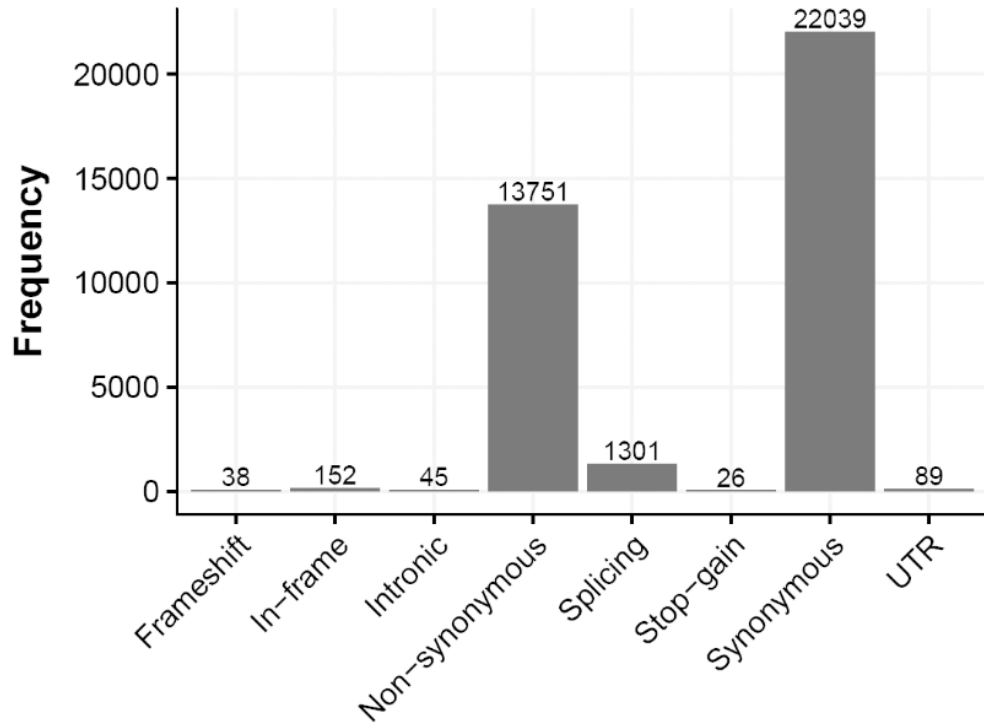

**B**

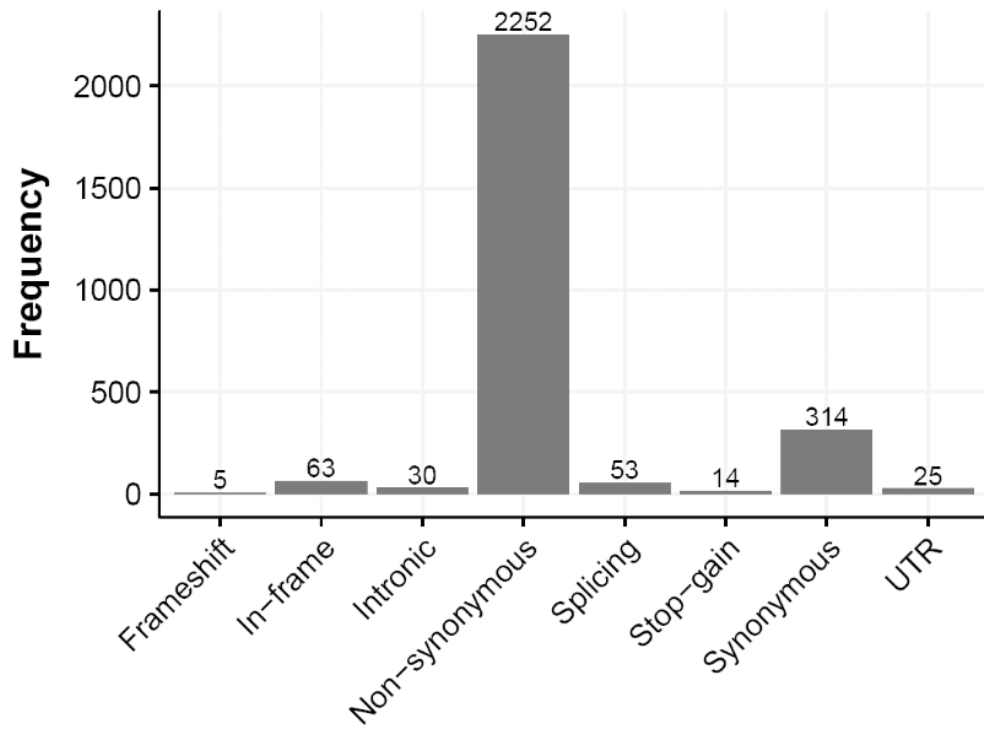

Supplementary Fig. S2

A

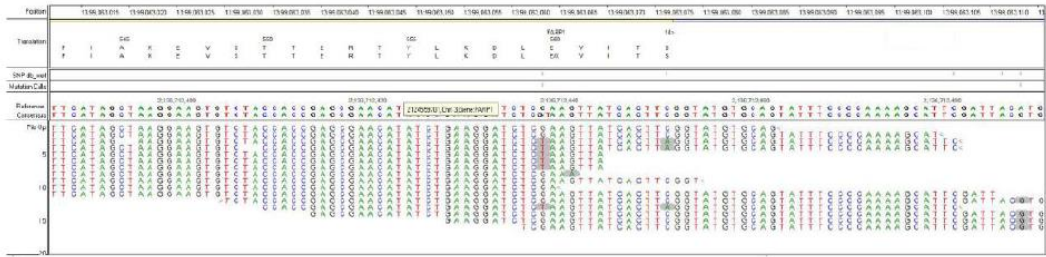

B

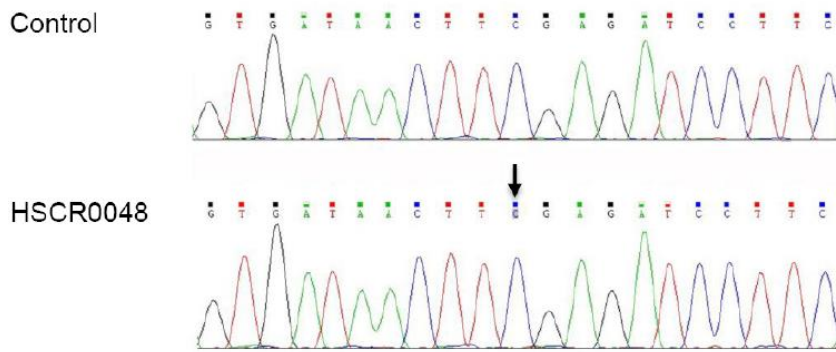





Supplementary Fig. S4

RET

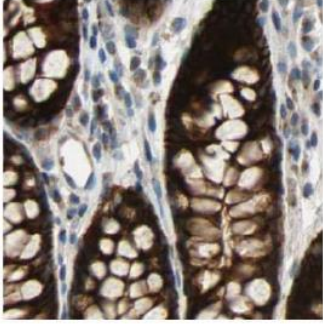

PTPN13

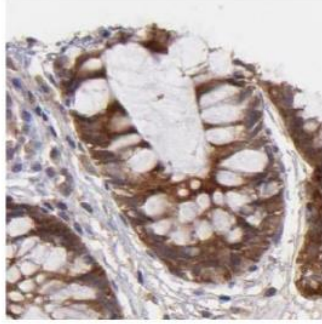

SACS

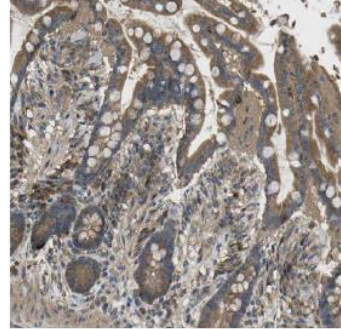

PLEKHH1

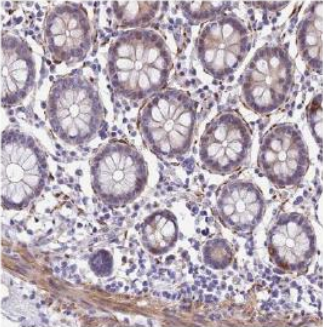

TRAP1

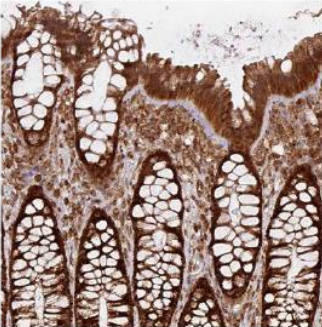

ZEB2

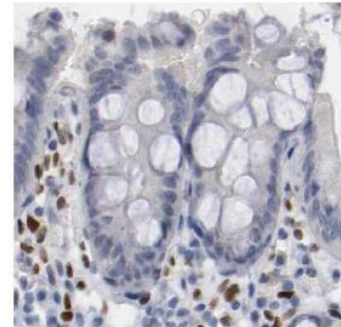

AGL

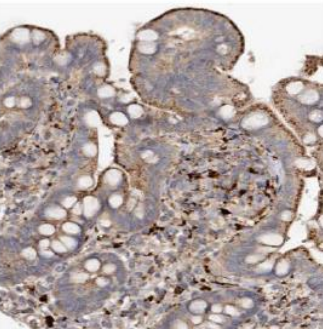

SEMA3D

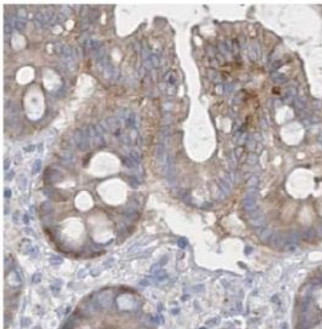

HHIPL2

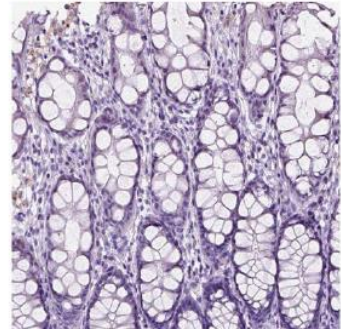

ENO3

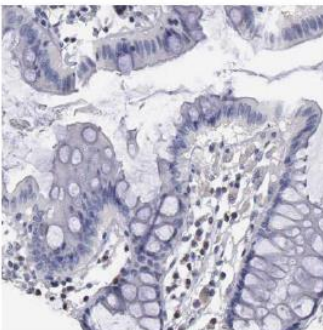

TLX2

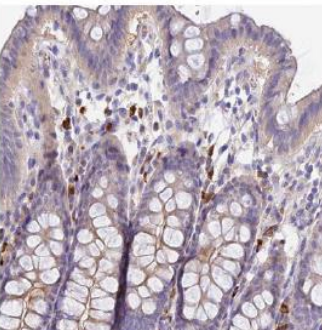

ZFH3

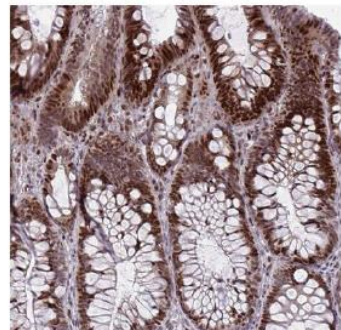

## References

1. Chatterjee, S. *et al.* Enhancer variants synergistically drive dysfunction of a gene regulatory network in Hirschsprung disease. *Cell*. **167**, 355-368 (2016).
2. Jiang, Q. *et al.* Functional loss of semaphorin 3C and/or semaphorin 3D and their epistatic interaction with ret are critical to Hirschsprung disease liability. *Am. J. Hum. Genet.* **96**, 581-596 (2015).
3. Borrego, S., Ruiz-Ferrer, M., Fernández, R. M., & Antiñolo, G. Hirschsprung's disease as a model of complex genetic etiology. *Histol. Histopathol.* **28**, 1117-1136 (2013).
4. Garcia-Barcelo, M. M. *et al.* Genome-wide association study identifies NRG1 as a susceptibility locus for Hirschsprung's disease. *Proc. Natl. Acad. Sci. USA.* **106**, 2694-2699 (2009).
5. Brooks, A.S. *et al.* Homozygous nonsense mutations in KIAA1279 are associated with malformations of the central and enteric nervous systems. *Am. J. Hum. Genet.* **77**, 120-126 (2005).
6. Nunez, M. I., Ludes-Meyers, J., & Aldaz, C. M. WWOX protein expression in normal human tissues. *J. Mol. Histol.* **37**, 115-125 (2006).
7. Sherwood, R. I., Chen, T. Y., & Melton, D. A. Transcriptional dynamics of endodermal organ formation. *Dev. Dyn.* **238**, 29-42 (2009).
8. Jiang, Q., Ho, Y. Y., Hao, L., Nichols, Berrios, C., & Chakravarti, A. Copy number variants in candidate genes are genetic modifiers of Hirschsprung disease. *PLoS. One.* **6**, e21219 (2011).
9. Heanue, T.A., & Pachnis, V. Expression profiling the developing mammalian enteric nervous system identifies marker and candidate Hirschsprung disease genes. *Proc. Natl. Acad. Sci. USA.* **103**, 6919-6924 (2006).
10. Pritchard, C. A., Bolin, L., Slattery, R., Murray, R., & McMahon, M. Post-natal lethality and neurological and gastrointestinal defects in mice with targeted disruption of the A-Raf protein kinase gene. *Curr Biol.* **6**, 614-617 (1996).
11. Hatano, M. *et al.* A novel pathogenesis of megacolon in Ncx/Hox11L.1 deficient mice. *J. Clin. Invest.* **100**, 795-801 (1997).
12. Zhang, Y., Kim, T.H., & Niswander, L. Phactr4 regulates directional migration of enteric neural crest through PP1, integrin signaling, and cofilin activity. *Genes. Dev.* **26**, 69-81 (2012).
13. Elms, P., Siggers, P., Napper, D., Greenfield, A., & Arkell, R. Zic2 is required for neural crest formation and hindbrain patterning during mouse development. *Dev. Biol.* **264**, 391-406 (2003).
14. Ngan, E. S. *et al.* Hedgehog/Notch-induced premature gliogenesis represents a new disease mechanism for Hirschsprung disease in mice and humans. *J. Clin. Invest.* **121**, 3467-3478 (2011).
15. Jia, H., Zhang, K., Chen, Q., Gao, H., & Wang, W. Downregulation of Notch-1/Jagged-2 in human colon tissues from Hirschsprung disease patients. *Int. J. Colorectal. Dis.* **27**, 37-41 (2012).
16. Sasselli, V., Boesmans, W., Vanden, Berghe, P., Tissir, F., Goffinet, A. M., & Pachnis, V. Planar cell polarity genes control the connectivity of enteric neurons. *J. Clin.*

- Invest.* **123**, 1763-1772 (2013).
17. Obermayr, F., Hotta, R., Enomoto, H., & Young, H. M. Development and developmental disorders of the enteric nervous system. *Nat. Rev. Gastroenterol. Hepatol.* **10**, 43-57 (2013).
